# Supplementary material
Source: PubMed Central journal article supplement (PMC2826144)
Supplement: NIHMS168513-supplement-01.pdf [file NIHMS168513-supplement-01.pdf]

|                     | Control               | Epilepsy                     | Localization Related         | Generalized           |
|---------------------|-----------------------|------------------------------|------------------------------|-----------------------|
| <b>Anterior CC</b>  |                       |                              |                              |                       |
| Mean FA             | 0.758 +/- 0.048       | 0.750 +/- 0.030              | 0.748 +/- 0.035              | 0.753 +/- 0.024       |
| Mean MD             | 0.00082 +/- 0.000042  | 0.000815 +/- 0.000043        | 0.000816 +/- 0.000047        | 0.000804 +/- 0.000042 |
| Mean DA             | 0.001738 +/- 0.000127 | 0.001697 +/- 0.000094        | 0.001704 +/- 0.000092        | 0.001688 +/- 0.000103 |
| Mean DR             | 0.000357 +/- 0.000051 | 0.750231 +/- 0.000040        | 0.000376 +/- 0.000048        | 0.000362 +/- 0.000031 |
| <b>Posterior CC</b> |                       |                              |                              |                       |
| Mean FA             | 0.837 +/- 0.037       | <b>0.798 +/- 0.072</b>       | 0.809 +/- 0.059              | 0.783 +/- 0.090       |
| Mean MD             | 0.000703 +/- 0.000028 | <b>0.000754 +/- 0.000090</b> | <b>0.000744 +/- 0.000044</b> | 0.000769 +/- 0.000123 |
| Mean DA             | 0.001634 +/- 0.000089 | 0.001668 +/- 0.000131        | 0.001671 +/- 0.000119        | 0.001664 +/- 0.000155 |
| Mean DR             | 0.000236 +/- 0.000046 | <b>0.798324 +/- 0.000106</b> | 0.000288 +/- 0.000072        | 0.000322 +/- 0.000141 |
| <b>Fornix</b>       |                       |                              |                              |                       |
| Mean FA             | 0.566 +/- 0.024       | 0.552 +/- 0.027              | 0.551 +/- 0.029              | 0.553 +/- 0.026       |
| Mean MD             | 0.000842 +/- 0.000074 | 0.000884 +/- 0.000073        | <b>0.000904 +/- 0.000069</b> | 0.000871 +/- 0.000079 |
| Mean DA             | 0.001447 +/- 0.000105 | 0.001502 +/- 0.000106        | 0.001523 +/- 0.000085        | 0.001473 +/- 0.000129 |
| Mean DR             | 0.000525 +/- 0.000039 | 0.551558 +/- 0.000062        | <b>0.000593 +/- 0.000069</b> | 0.000570 +/- 0.000058 |
| <b>Cingulum</b>     |                       |                              |                              |                       |
| Mean FA             | 0.535 +/- 0.025       | <b>0.513 +/- 0.022</b>       | 0.507 +/- 0.021              | 0.522 +/- 0.020       |
| Mean MD             | 0.000709 +/- 0.000021 | 0.000730 +/- 0.000032        | 0.000739 +/- 0.000034        | 0.000714 +/- 0.000020 |
| Mean DA             | 0.001184 +/- 0.000039 | 0.001189 +/- 0.000053        | 0.001200 +/- 0.000062        | 0.001176 +/- 0.000035 |
| Mean DR             | 0.000473 +/- 0.000026 | <b>0.513477 +/- 0.000027</b> | 0.000513 +/- 0.000022        | 0.000483 +/- 0.000021 |
| <b>Int. Capsule</b> |                       |                              |                              |                       |
| Mean FA             | 0.628 +/- 0.014       | 0.629 +/- 0.011              | 0.630 +/- 0.011              | 0.629 +/- 0.011       |
| Mean MD             | 0.000666 +/- 0.000015 | 0.000668 +/- 0.000021        | 0.000677 +/- 0.000021        | 0.000655 +/- 0.000010 |
| Mean DA             | 0.001220 +/- 0.000015 | 0.001228 +/- 0.000041        | 0.001247 +/- 0.000042        | 0.001203 +/- 0.000022 |
| Mean DR             | 0.000389 +/- 0.000018 | 0.629406 +/- 0.000013        | 0.000394 +/- 0.000014        | 0.000382 +/- 0.000010 |
| <b>Ext. Capsule</b> |                       |                              |                              |                       |
| Mean FA             | 0.502 +/- 0.010       | 0.498 +/- 0.017              | 0.499 +/- 0.019              | 0.498 +/- 0.016       |
| Mean MD             | 0.000693 +/- 0.000023 | 0.000698 +/- 0.000024        | 0.000703 +/- 0.000026        | 0.000691 +/- 0.000017 |
| Mean DA             | 0.001107 +/- 0.000044 | 0.001115 +/- 0.000027        | 0.001123 +/- 0.000029        | 0.001103 +/- 0.000020 |
| Mean DR             | 0.000485 +/- 0.000017 | 0.498098 +/- 0.000024        | 0.000495 +/- 0.000029        | 0.000485 +/- 0.000018 |
